# Supplementary material for: Charging OBO‐Fused Double [5]Helicene with Electrons
Source: Angew Chem Int Ed Engl. 2019 Sep 9;58(42):14969–73. doi: 10.1002/anie.201908658 (PMC6916263; doi:10.1002/anie.201908658)
Supplement: Supplementary file 1 — Supplementary [file ANIE-58-14969-s001.pdf]

## Supporting Information

### **Charging OBO-Fused Double [5]Helicene with Electrons**

*Zheng Zhou, Xiao-Ye Wang, Zheng Wei, Klaus Müllen,\* and Marina A. Petrukhina\**

anie\_201908658\_sm\_miscellaneous\_information.pdf

## Supporting Information

|                                                                                                                                                                                                                                            |     |
|--------------------------------------------------------------------------------------------------------------------------------------------------------------------------------------------------------------------------------------------|-----|
| <b>I. Materials and Methods</b>                                                                                                                                                                                                            | S3  |
| <b>Preparation of <math>[\{\text{Na}^+(\text{18-crown-6})(\text{THF})_2\}_2(\text{1}^{2-})] \cdot 2\text{THF}</math> (2·2THF)</b>                                                                                                          | S3  |
| <b>Preparation of <math>[\{\text{K}^+(\text{18-crown-6})(\text{THF})_2\}\{\text{K}^+(\text{18-crown-6})\}(\text{1}^{2-})] \cdot 0.5\text{THF}</math> (3·0.5THF)</b>                                                                        | S3  |
| <b>II. UV/Vis Spectroscopy Investigation</b>                                                                                                                                                                                               | S4  |
| <b>Probe preparation of Na/1 in THF</b>                                                                                                                                                                                                    | S4  |
| <b>Figure S1. UV/Vis spectra of Na/1 in THF</b>                                                                                                                                                                                            | S4  |
| <b>Probe preparation of Na/18-crown-6/1 in THF</b>                                                                                                                                                                                         | S5  |
| <b>Figure S2. UV/Vis spectra of Na/18-crown-6/1</b>                                                                                                                                                                                        | S5  |
| <b>Figure S3. UV/Vis spectra of <i>in situ</i> generated <math>[\text{Na}^+(\text{THF})_n]_2[\text{1}^{2-}]</math> and <math>[\text{Na}^+(\text{18-crown-6})(\text{THF})_n]_2[\text{1}^{2-}]</math> vs. dissolved crystals of <b>2</b></b> | S5  |
| <b>Probe preparation of K/1 in THF</b>                                                                                                                                                                                                     | S6  |
| <b>Figure S4. UV/Vis spectra of K/1 in THF</b>                                                                                                                                                                                             | S6  |
| <b>Probe preparation of K/18-crown-6/1 in THF</b>                                                                                                                                                                                          | S6  |
| <b>Figure S5. UV/Vis spectra of K/18-crown-6/1</b>                                                                                                                                                                                         | S7  |
| <b>Figure S6. UV/Vis spectra of <i>in situ</i> generated <math>[\text{K}^+(\text{THF})_n]_2[\text{1}^{2-}]</math> and <math>[\text{K}^+(\text{18-crown-6})(\text{THF})_n]_2[\text{1}^{2-}]</math> vs. dissolved crystals of <b>3</b></b>   | S7  |
| <b>III. <math>^1\text{H}</math> NMR Spectroscopy Investigation</b>                                                                                                                                                                         | S8  |
| <b>Probe preparation of Na/18-crown-6/1 in THF-<i>d</i><sub>8</sub></b>                                                                                                                                                                    | S8  |
| <b>Figure S7. Variable-temperature <math>^1\text{H}</math> NMR spectra of <i>in situ</i> generated <math>[\text{Na}^+(\text{18-crown-6})(\text{THF})_n]_2[\text{1}^{2-}]</math>, aromatic region</b>                                       | S8  |
| <b>Figure S8. <math>^1\text{H}</math> NMR spectra of <i>in situ</i> generated <math>[\text{Na}^+(\text{18-crown-6})(\text{THF})_n]_2[\text{1}^{2-}]</math> at 25 °C and –80 °C</b>                                                         | S9  |
| <b>Figure S9. <math>^1\text{H}</math> NMR spectra of <i>in situ</i> generated <math>[\text{Na}^+(\text{18-crown-6})(\text{THF})_n]_2[\text{1}^{2-}]</math> at 25 °C and –80 °C with integrations, aromatic region</b>                      | S9  |
| <b>Probe preparation of <b>2</b> in THF-<i>d</i><sub>8</sub></b>                                                                                                                                                                           | S10 |
| <b>Figure S10. Variable-temperature <math>^1\text{H}</math> NMR spectra of <b>2</b> in THF-<i>d</i><sub>8</sub>, aromatic region</b>                                                                                                       | S10 |
| <b>Figure S11. <math>^1\text{H}</math> NMR spectra of <b>2</b> at 25 °C and –80 °C</b>                                                                                                                                                     | S11 |
| <b>Figure S12. <math>^1\text{H}</math> NMR spectra of <b>2</b> at 25 °C and –80 °C with integrations, aromatic region</b>                                                                                                                  | S11 |
| <b>Probe preparation of K/18-crown-6/1 in THF-<i>d</i><sub>8</sub></b>                                                                                                                                                                     | S12 |
| <b>Figure S13. Variable-temperature <math>^1\text{H}</math> NMR spectra of <i>in situ</i> generated <math>[\text{K}^+(\text{18-crown-6})(\text{THF})_n]_2[\text{1}^{2-}]</math>, aromatic region</b>                                       | S12 |
| <b>Figure S14. <math>^1\text{H}</math> NMR spectra of <i>in situ</i> generated <math>[\text{K}^+(\text{18-crown-6})(\text{THF})_n]_2[\text{1}^{2-}]</math> at 25 °C and –80 °C</b>                                                         | S13 |
| <b>Figure S15. <math>^1\text{H}</math> NMR spectra of <i>in situ</i> generated <math>[\text{K}^+(\text{18-crown-6})(\text{THF})_n]_2[\text{1}^{2-}]</math> at 25 °C and –80 °C with integrations, aromatic region</b>                      | S13 |
| <b>Probe preparation of <b>3</b> in THF-<i>d</i><sub>8</sub></b>                                                                                                                                                                           | S14 |
| <b>Figure S16. Variable-temperature <math>^1\text{H}</math> NMR spectra of <b>3</b>, aromatic region</b>                                                                                                                                   | S14 |

|                                                                                                                                      |     |
|--------------------------------------------------------------------------------------------------------------------------------------|-----|
| <b>Figure S17.</b> $^1\text{H}$ NMR spectra of <b>3</b> at 25 °C and –80 °C                                                          | S14 |
| <b>Figure S18.</b> $^1\text{H}$ NMR spectra of <b>3</b> at 25 °C and –80 °C with integrations, aromatic region                       | S15 |
| <b>IV. Redox Reversibility Study</b>                                                                                                 | S16 |
| <b>NMR Probe Preparation</b>                                                                                                         | S16 |
| <b>Figure S19.</b> $^1\text{H}$ NMR spectra of <b>1</b> , <i>in situ</i> generated <b>1</b> <sup>2–</sup> , and its quenched product | S16 |
| <b>DART-MS Sample Preparation</b>                                                                                                    | S17 |
| <b>Figure S20.</b> DART-MS spectra of <b>1</b> and the quenched product of <i>in situ</i> generated <b>1</b> <sup>2–</sup>           | S17 |
| <b>V. Crystal Structure Solution and Refinement Details</b>                                                                          | S18 |
| <b>Table S1.</b> Crystal Data and Structure Refinement Parameters for <b>2</b> and <b>3</b>                                          | S19 |
| <b>Figure S21.</b> ORTEP drawing of <b>2</b>                                                                                         | S20 |
| <b>Figure S22.</b> ORTEP drawing of <b>3</b>                                                                                         | S20 |
| <b>Table S2.</b> Selected C–C bond distances in <b>1</b> , <b>2</b> and <b>3</b>                                                     | S21 |
| <b>Table S3.</b> Selected bond distances in <b>1</b> , <b>2</b> and <b>3</b>                                                         | S22 |
| <b>Table S4.</b> Selected torsion angles and plane angles in <b>1</b> , <b>2</b> and <b>3</b> , along with labeling scheme           | S22 |
| <b>VI. Theoretical Calculations</b>                                                                                                  | S23 |
| <b>Table S5.</b> Cartesian coordinates of the neutral <b>1</b>                                                                       | S23 |
| <b>Table S6.</b> Cartesian coordinates of the dianion <b>1</b> <sup>2–</sup>                                                         | S24 |
| <b>VII. References</b>                                                                                                               | S26 |

## I. Materials and Methods

All manipulations were carried out using break-and-seal<sup>[1]</sup> and glove-box techniques under an atmosphere of argon. Tetrahydrofuran (THF) and hexanes were purchased from Pharmco-Aaper and were dried over Na/benzophenone and distilled prior to use. THF-*d*<sub>8</sub> was purchased from Sigma Aldrich, dried over NaK<sub>2</sub> alloy and vacuum-transferred. Sodium, potassium and 18-Crown-6 ether were purchased from Sigma Aldrich and used as received. OBO-double[5]helicene (C<sub>30</sub>H<sub>16</sub>B<sub>2</sub>O<sub>4</sub>, **1**) was prepared according to the previously reported procedure<sup>[2]</sup> and purified by sublimation. The UV/Vis spectra were recorded on a PerkinElmer Lambda 35 spectrometer. The <sup>1</sup>H NMR spectra were measured using Bruker AC-400 and Ascend-500 spectrometers and referenced to the resonances of the solvent used.

### Preparation of [{Na<sup>+</sup>(18-crown-6)(THF)<sub>2</sub>}]<sub>2</sub>(1<sup>2-</sup>)·2THF (2·2THF)

THF (1.2 mL) was added to a flask containing excess Na (1.1 mg, 8 eq.), 18-crown-6 ether (5.7 mg, 0.022 mmol) and **1** (5 mg, 0.011 mmol). The initial color of the mixture was pale yellow (neutral ligand). Within 15 minutes, the color turned to dark red-brown and then to dark green-blue (in *ca.* 60 min). After a total of 24 h of stirring, the resulting suspension was filtered; the dark green-blue filtrate was layered with hexanes (0.9 mL) and placed at 5 °C. Dark green-blue blocks were present in high yield after 4 days. Yield: 85%. UV/Vis (THF): λ<sub>max</sub> 313, 398, 541 and 753 nm. <sup>1</sup>H NMR (THF-*d*<sub>8</sub>, -80 °C): δ = 1.78 (16H, THF), 3.54 (48H, 18-crown-6), 3.61 (16H, THF), 4.00 (4H, 1<sup>2-</sup>), 5.59 (4H, 1<sup>2-</sup>), 5.88 (4H, 1<sup>2-</sup>), 6.26 (4H, 1<sup>2-</sup>).

### Preparation of [{K<sup>+</sup>(18-crown-6)(THF)<sub>2</sub>}]<sub>2</sub>{K<sup>+</sup>(18-crown-6)}(1<sup>2-</sup>)·0.5THF (3·0.5THF)

THF (1.5 mL) was added to a flask containing excess K (1.1 mg, 6 eq.), 18-crown-6 ether (2.3 mg, 0.009 mmol) and **1** (2 mg, 0.004 mmol). The initial color of the mixture was pale yellow (neutral ligand). Within a few minutes, the color turned to dark red-brown and then to dark green-blue (in *ca.* 50 min). After a total of 2 h of stirring, the resulting suspension was filtered; the dark green-blue filtrate was layered with hexanes (1.2 mL) and placed at 5 °C. Dark green-blue blocks were present in good yield after 3 days. Yield: 75%. UV/Vis (THF): λ<sub>max</sub> 313, 381, 535 and 773 nm. <sup>1</sup>H NMR (THF-*d*<sub>8</sub>, -80 °C): δ = 1.78 (16H, THF), 3.54 (48H, 18-crown-6), 3.61 (16H, THF), 4.01 (4H, 1<sup>2-</sup>), 5.60 (4H, 1<sup>2-</sup>), 5.88 (4H, 1<sup>2-</sup>), 6.30 (4H, 1<sup>2-</sup>).

## II. UV/Vis Spectroscopy Investigation

### Probe preparation of Na/1 in THF:

THF (4 mL) was added to a probe containing excess Na metal (~5 eq.) and **1** (0.02 mg,  $4.3 \times 10^{-5}$  mmol) and UV/Vis spectra were monitored at different reaction times (total 24h) at room temperature.

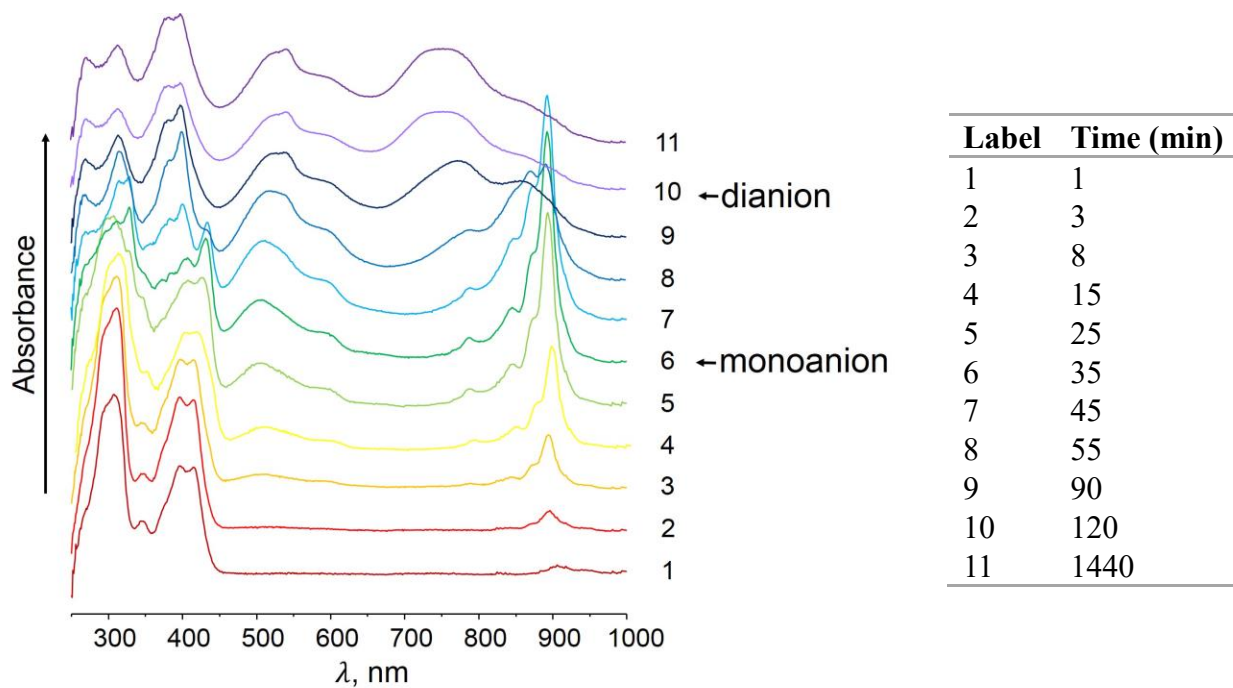

**Figure S1.** UV/Vis spectra of Na/**1** in THF.

### Probe preparation of Na/18-crown-6/1 in THF:

THF (4 mL) was added to a probe containing excess Na metal (~5 eq.), 18-crown-6 (~2.5 eq.) and **1** (0.02 mg,  $4.3 \times 10^{-5}$  mmol) and UV/Vis spectra were monitored at different reaction times (total 24h) at room temperature.

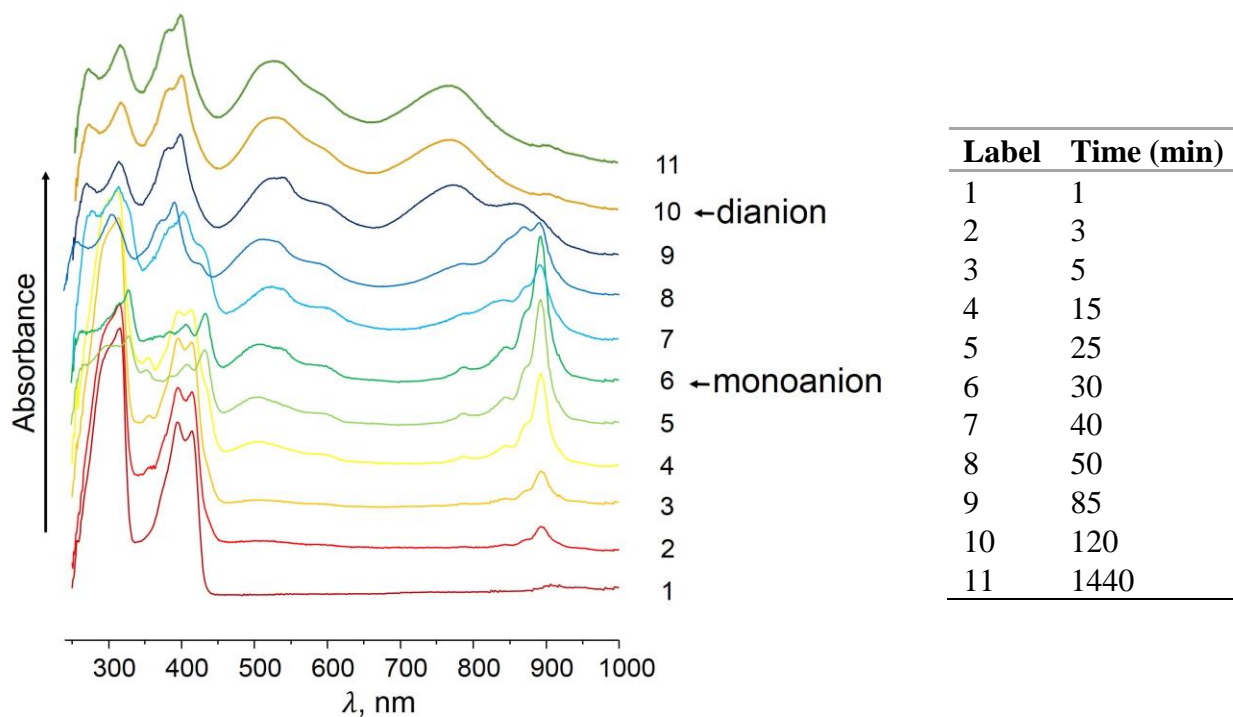

**Figure S2.** UV/Vis spectra of Na/18-crown-6/1 in THF.

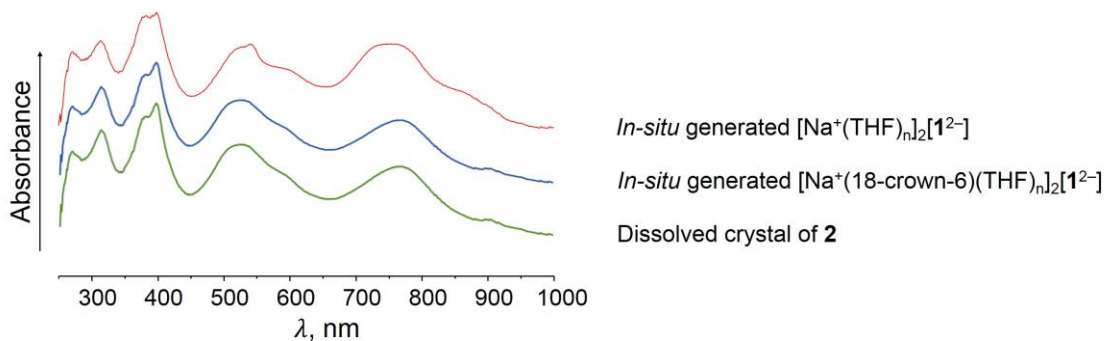

| Label                 | $\lambda_{\text{max}}$ (nm) |
|-----------------------|-----------------------------|
| Dissolved crystal     | 313, 398, 541, 753          |
| In-situ with crown    | 314, 398, 535, 766          |
| In-situ without crown | 315, 399, 535, 766          |

**Figure S3.** UV/Vis spectra of *in situ* generated  $[\text{Na}^+(\text{THF})_n]_2[\mathbf{1}^{2-}]$  and  $[\text{Na}^+(18\text{-crown-6})(\text{THF})_n]_2[\mathbf{1}^{2-}]$  vs. dissolved crystals of **2**·2THF.

**Probe preparation of K/1 in THF:**

THF (4 mL) was added to a probe containing excess K metal (~4 eq.) and **1** (0.02 mg,  $4.3 \times 10^{-5}$  mmol) and UV/Vis spectra were monitored at different reaction times (total 24h) at room temperature. *Note: after 30 hours the bulk precipitation was observed and that prevented further reaction monitoring.*

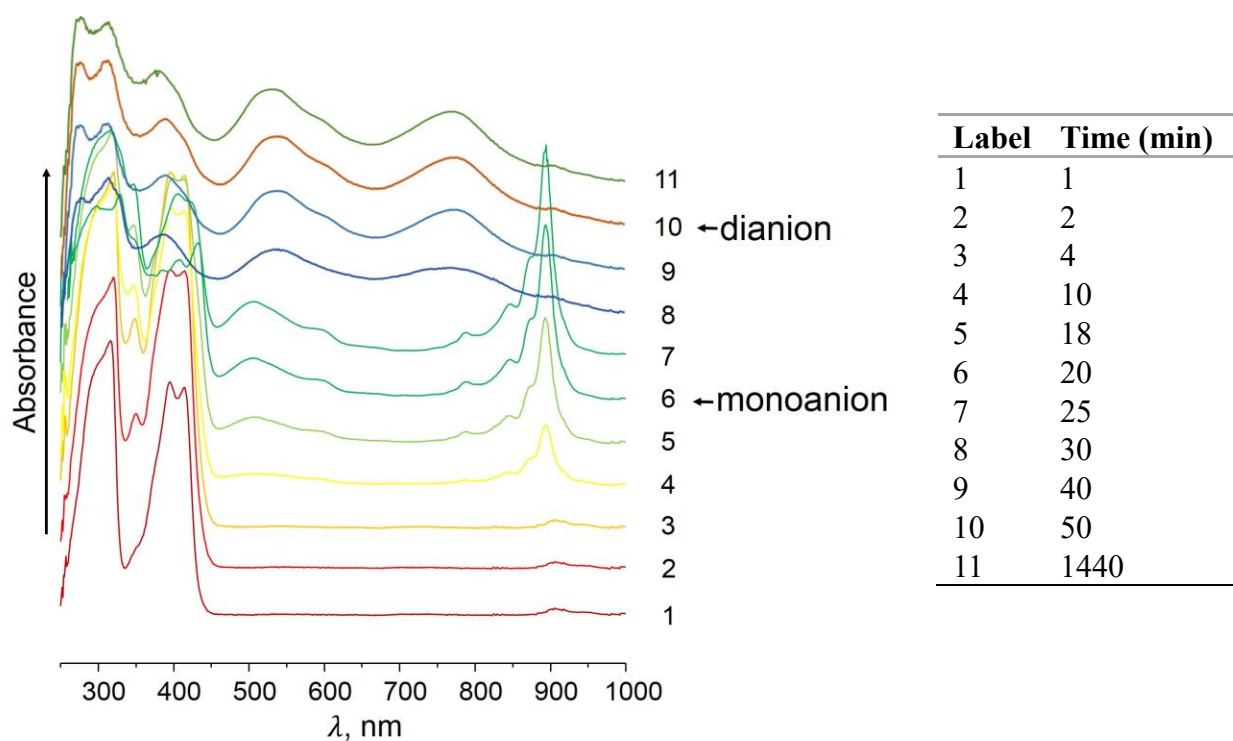

**Figure S4.** UV/Vis spectra of K/1 in THF.

**Probe preparation of K/18-crown-6/1 in THF:**

THF (4 mL) was added to a probe containing excess K metal (~4 eq.), 18-crown-6 (~2.5 eq.) and **1** (0.02 mg,  $4.3 \times 10^{-5}$  mmol) and UV/Vis spectra were monitored at different reaction times (total 24h) at room temperature. *Note: after 30 hours the bulk precipitation was observed and that prevented further reaction monitoring.*

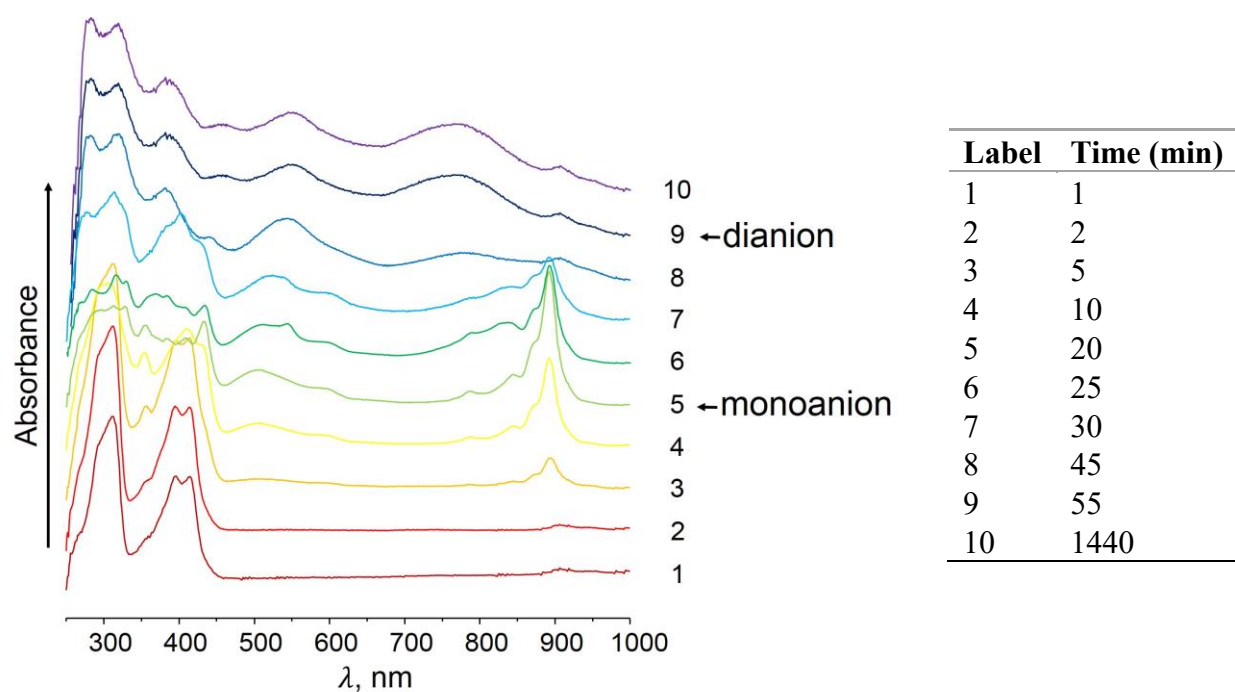

**Figure S5.** UV/Vis spectra of K/18-crown-6/1 in THF.

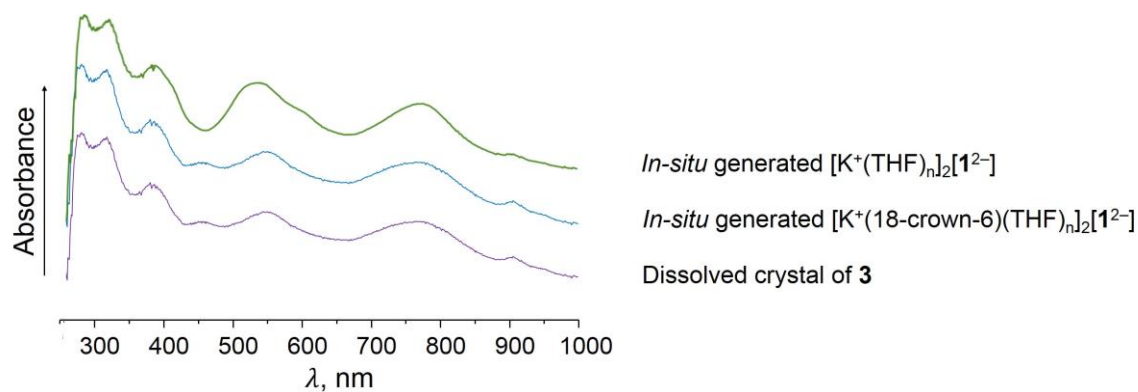

| Label                        | $\lambda_{\text{max}}$ (nm) |
|------------------------------|-----------------------------|
| Dissolved crystals           | 313, 381, 535, 773          |
| <i>In-situ</i> with crown    | 314, 376, 534, 772          |
| <i>In-situ</i> without crown | 314, 383, 541, 771          |

**Figure S6.** UV/Vis spectra of *in situ* generated  $[\text{K}^+(\text{THF})_n]_2[\mathbf{1}^{2-}]$  and  $[\text{K}^+(18\text{-crown-6})(\text{THF})_n]_2[\mathbf{1}^{2-}]$  vs. dissolved crystals of **3**.

### III. $^1\text{H}$ NMR Spectroscopy Investigation

#### Probe preparation of Na/18-Crown-6/1 in THF- $d_8$ :

THF- $d_8$  (0.7 mL) was added to an NMR probe containing excess Na metal ( $\sim 8$  eq.), 18-crown-6 ( $\sim 2.2$  eq.) and **1** (3 mg, 0.007 mmol). The initial color of the mixture was red-brown (monoanion stage). The probe was allowed to sit for 24 hours resulting in a dark green-blue solution (dianion). The Na metal was decanted from the mixture and  $^1\text{H}$  NMR spectra were monitored.

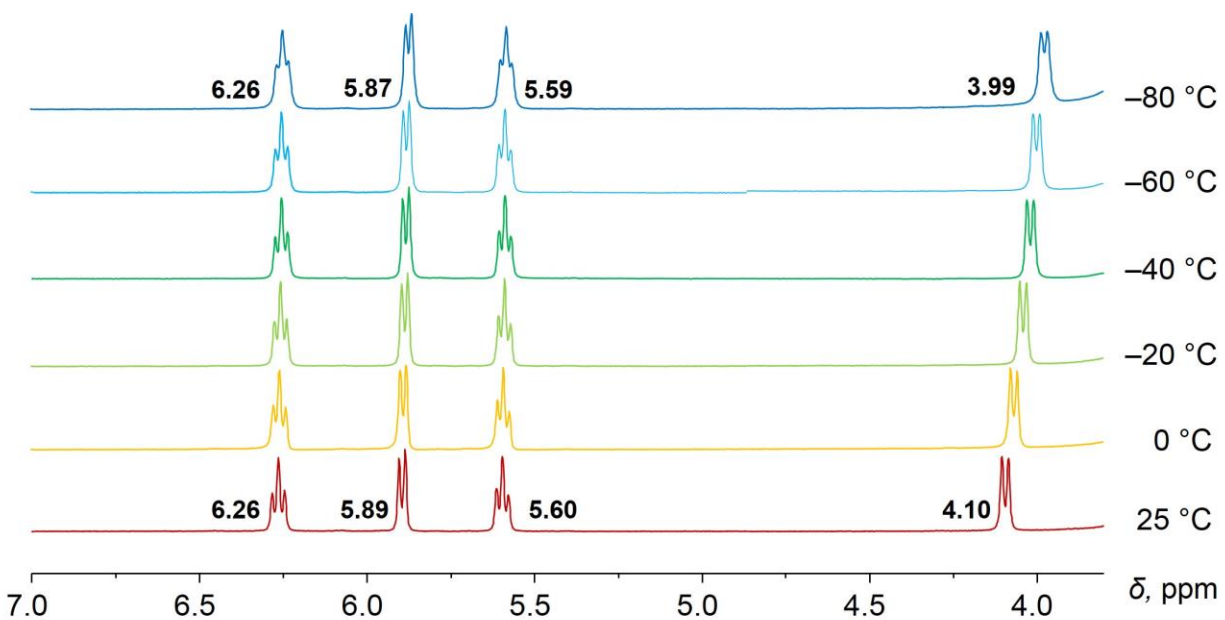

**Figure S7.** Variable-temperature  $^1\text{H}$  NMR spectra of *in situ* generated  $[\text{Na}^+(18\text{-crown-6})(\text{THF})_n]_2[\mathbf{1}^{2-}]$  in  $\text{THF-}d_8$ , aromatic region.

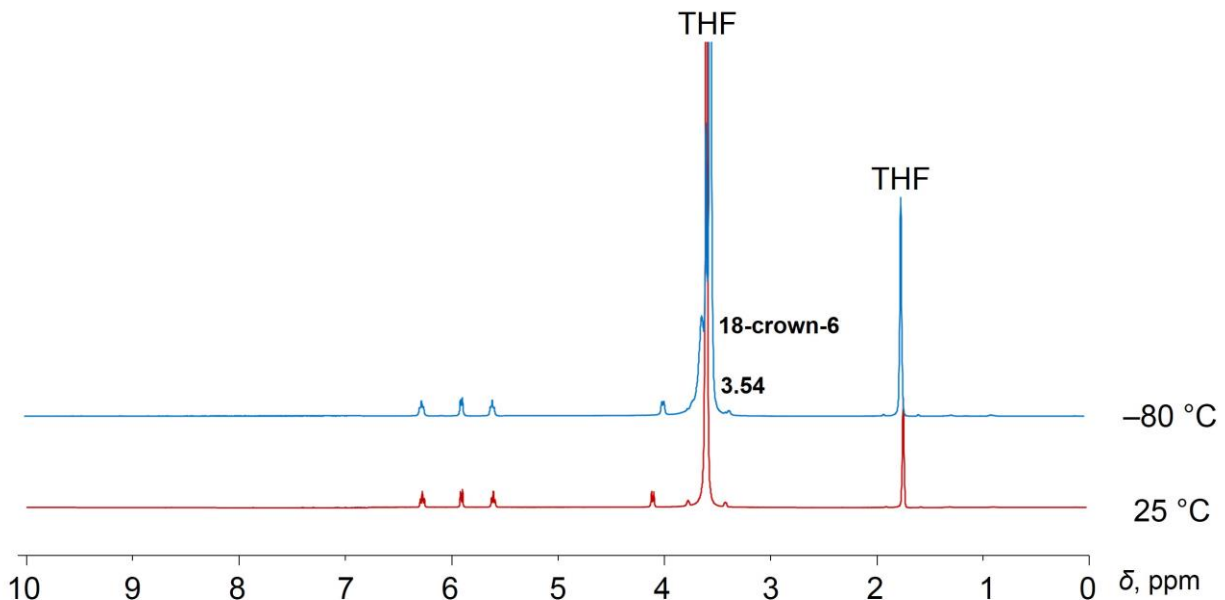

**Figure S8.**  $^1\text{H}$  NMR spectra of *in situ* generated  $[\text{Na}^+(\text{18-crown-6})(\text{THF})_n]_2[\mathbf{1}^{2-}]$  in  $\text{THF-}d_8$  at 25 °C and  $-80$  °C.

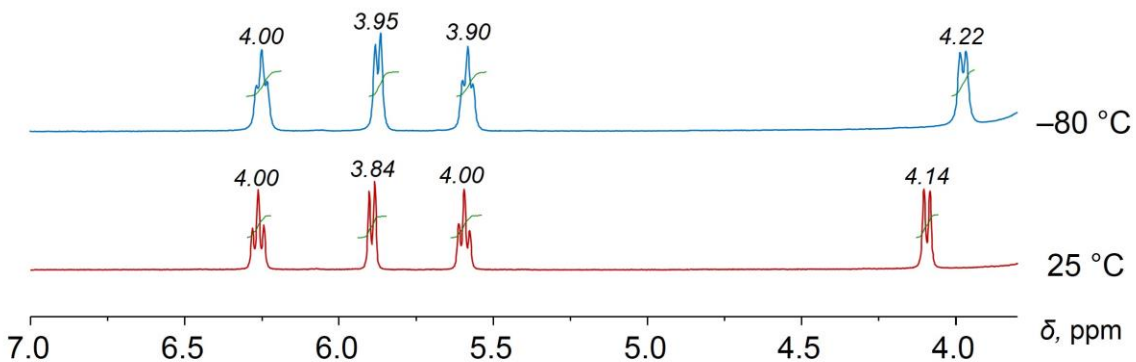

**Figure S9.**  $^1\text{H}$  NMR spectra of *in situ* generated  $[\text{Na}^+(\text{18-crown-6})(\text{THF})_n]_2[\mathbf{1}^{2-}]$  in  $\text{THF-}d_8$  at 25 °C and  $-80$  °C with integrations, aromatic region.

**Probe preparation of 2 in THF-*d*<sub>8</sub>:**

5 mg of crystalline **2**·2THF were washed several times with hexanes and dried *in-vacuo*. THF-*d*<sub>8</sub> (0.7 mL) was added to the crystals and the solution was transferred to an NMR tube.

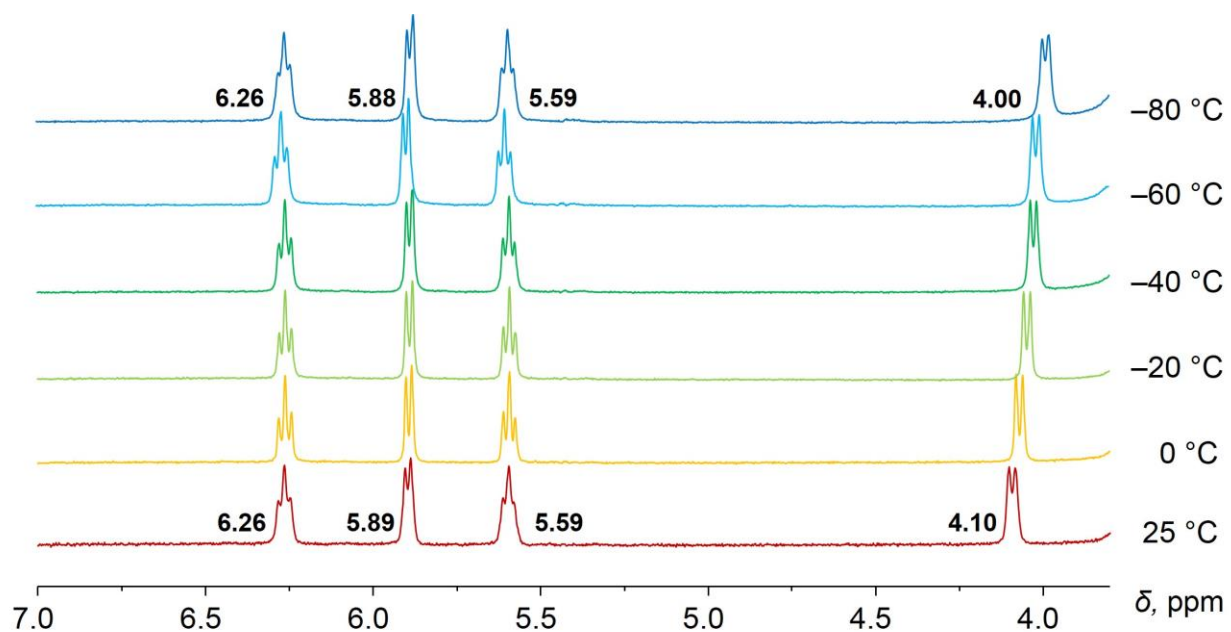

**Figure S10.** Variable-temperature <sup>1</sup>H NMR spectra of **2** in THF-*d*<sub>8</sub>, aromatic region.

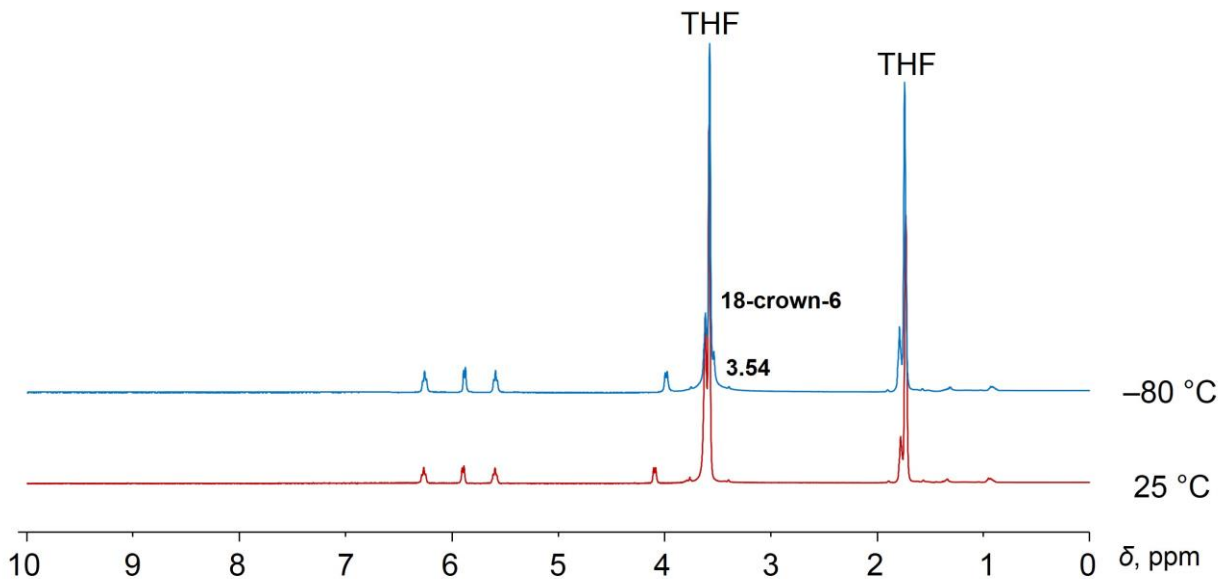

**Figure S11.**  $^1\text{H}$  NMR spectra of **2** in  $\text{THF-}d_8$  at 25 °C and –80 °C.

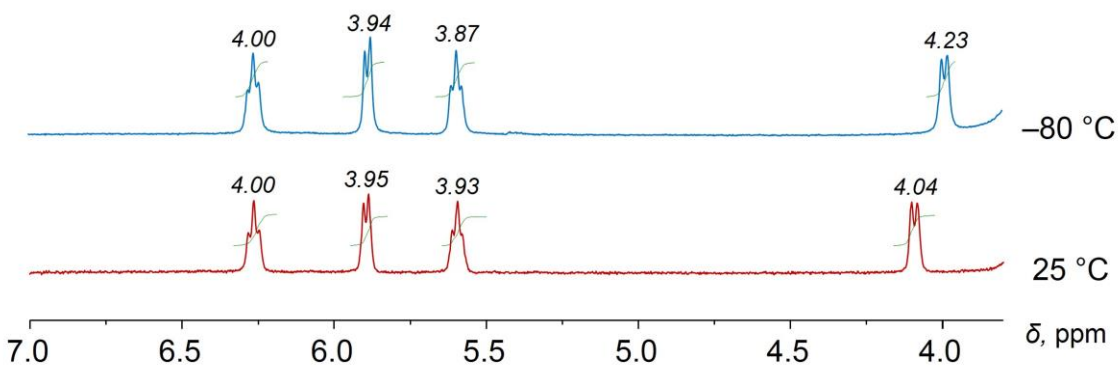

**Figure S12.**  $^1\text{H}$  NMR spectra of **2** in  $\text{THF-}d_8$  at 25 °C and –80 °C with integrations, aromatic region.

**Probe preparation of K/18-crown-6/1 in THF-*d*<sub>8</sub>:**

THF-*d*<sub>8</sub> (0.7 mL) was added to an NMR tube containing excess K metal (~7 eq.), 18-crown-6 (~2.1 eq.) and **1** (3 mg, 0.0066 mmol). The initial color of the mixture was red-brown. The probe was allowed to sit for 24 hours resulting in a dark blue-green solution. The Na metal was decanted from the mixture and <sup>1</sup>H NMR spectra were monitored.

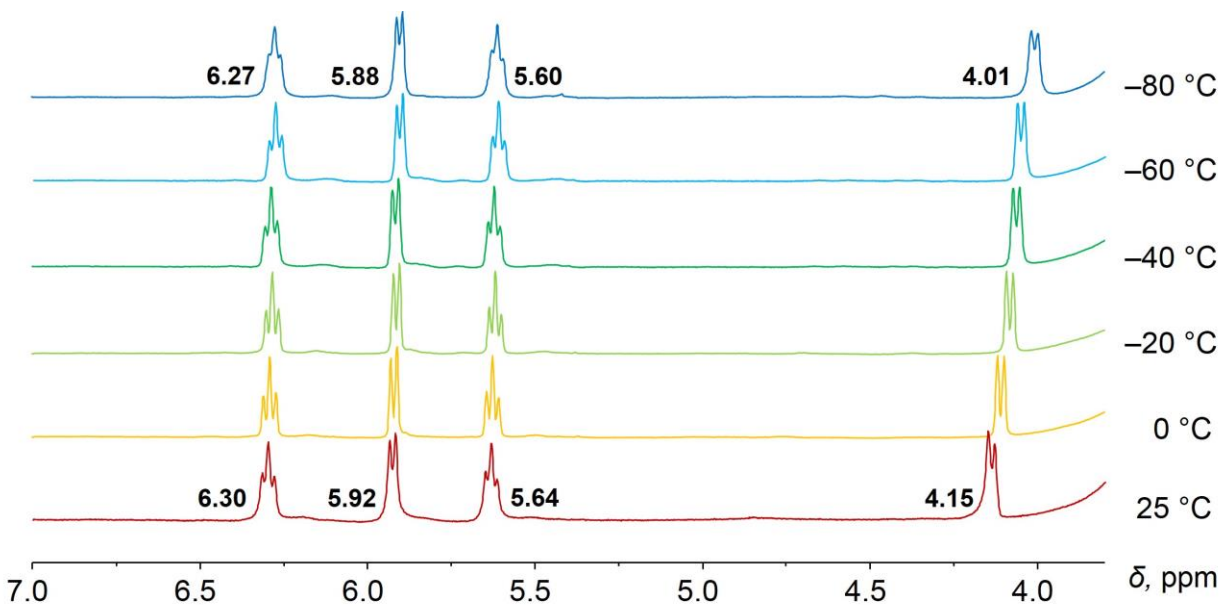

**Figure S13.** Variable-temperature <sup>1</sup>H NMR spectra of *in situ* generated [K<sup>+</sup>(18-crown-6)(THF)<sub>n</sub>]<sub>2</sub>[I<sup>2-</sup>] in THF-*d*<sub>8</sub>, aromatic region.

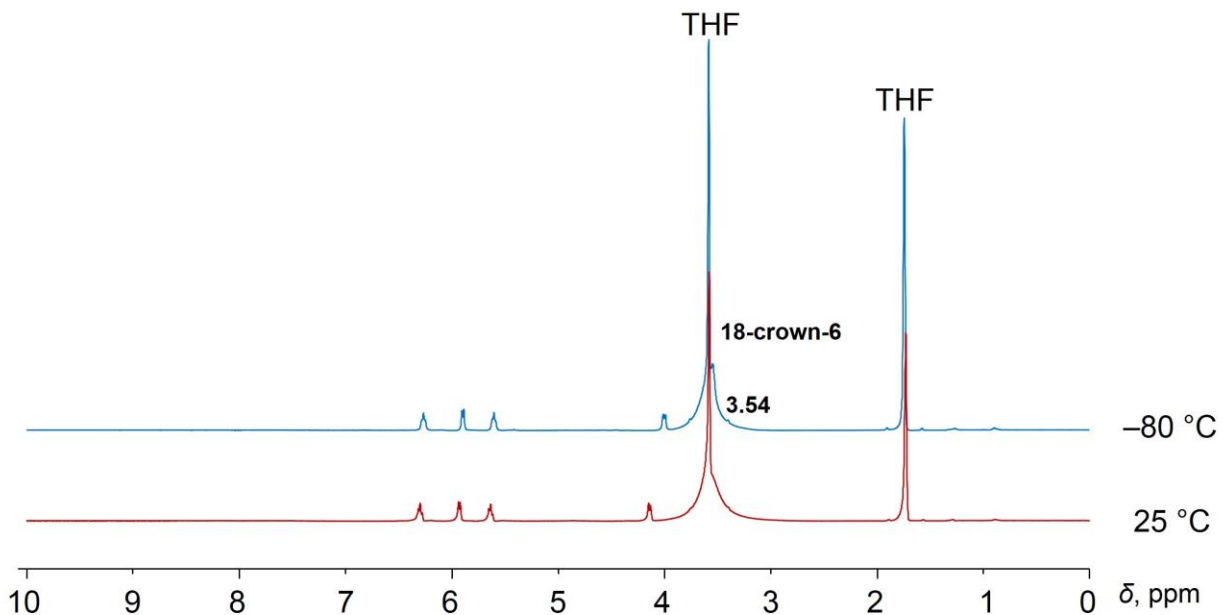

**Figure S14.**  $^1\text{H}$  NMR spectra of *in situ* generated  $[\text{K}^+(\text{18-crown-6})(\text{THF})_n]_2[\mathbf{1}^{2-}]$  in  $\text{THF-}d_8$  at 20 °C and  $-80$  °C.

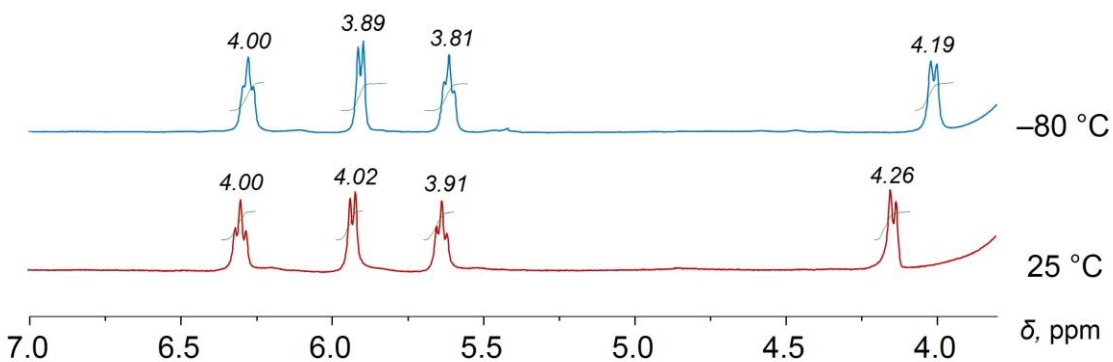

**Figure S15.**  $^1\text{H}$  NMR spectra of *in situ* generated  $[\text{K}^+(\text{18-crown-6})(\text{THF})_n]_2[\mathbf{1}^{2-}]$  in  $\text{THF-}d_8$  at 20 °C and  $-80$  °C with integrations, aromatic region.

**Probe preparation of **3** in THF-*d*<sub>8</sub>:**

5 mg of crystalline **3**·0.5THF were washed several times with hexanes and dried *in-vacuo*. THF-*d*<sub>8</sub> (0.7 mL) was added to the crystals and the solution was transferred to an NMR tube.

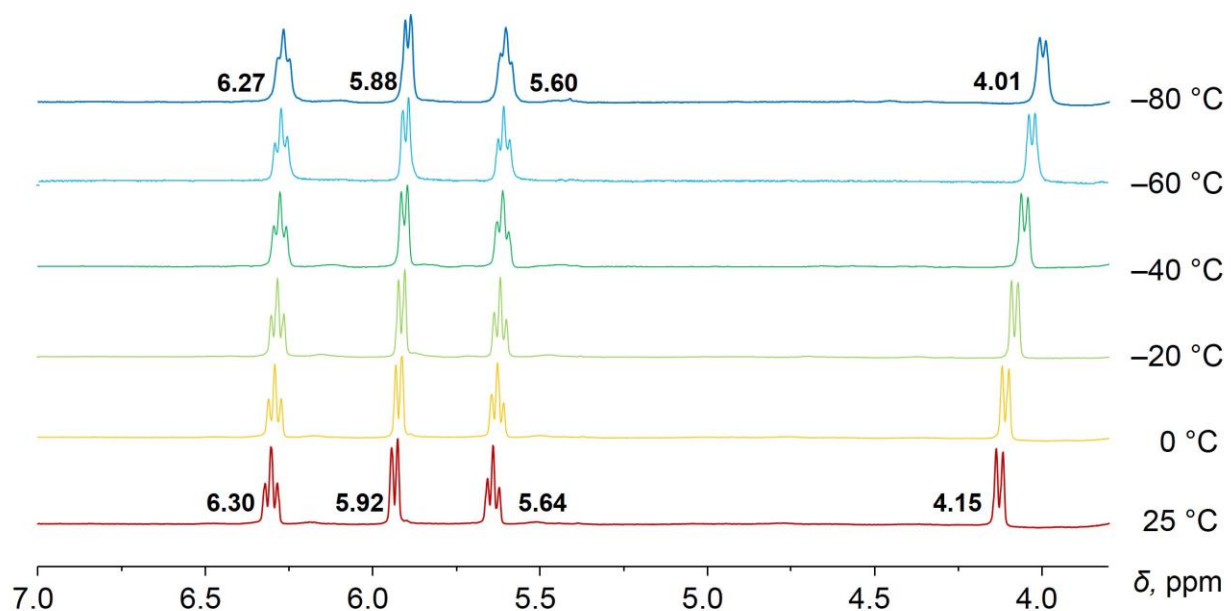

**Figure S16.** Variable-temperature <sup>1</sup>H NMR spectra of **3** in THF-*d*<sub>8</sub>, aromatic region.

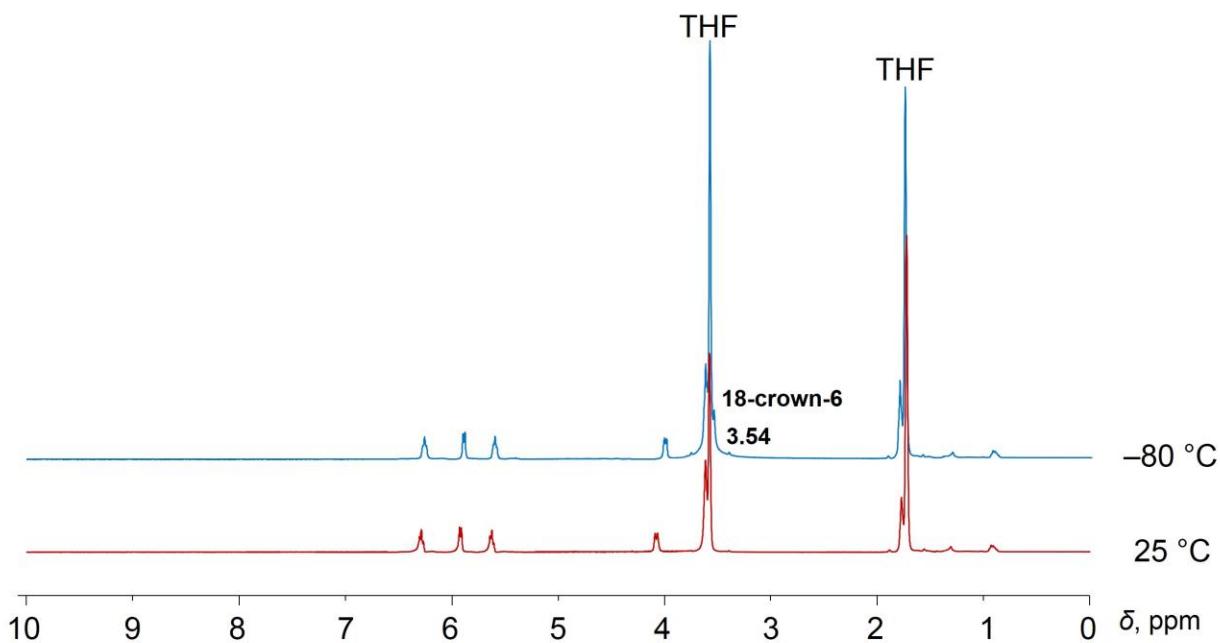

**Figure S17.** <sup>1</sup>H NMR spectra of **3** in THF-*d*<sub>8</sub> at 20 °C and -80 °C.

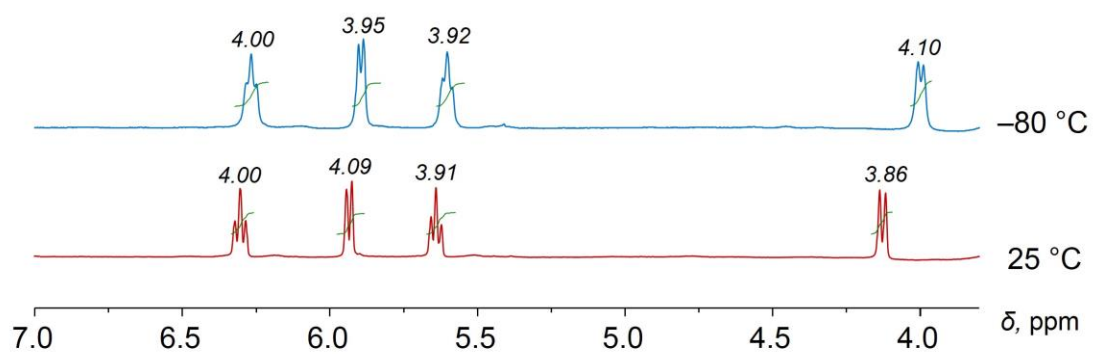

**Figure S18.**  $^1\text{H}$  NMR spectra of **3** in  $\text{THF-}d_8$  at  $25\text{ }^\circ\text{C}$  and  $-80\text{ }^\circ\text{C}$  with integrations, aromatic region.

#### IV. Redox Reversibility Study

##### NMR Probe Preparation

**1** (5 mg, 0.0108 mmol), one piece of Na metal (~10 eq.) and 18-crown-6 ether (5.7 mg, 0.0216 mmol) were added into an NMR tube, followed by addition of 0.7 mL of fresh THF-*d*<sub>8</sub>. The tube was sealed under argon. The <sup>1</sup>H NMR spectrum of **1** was collected immediately, and that of **1**<sup>2-</sup> was collected after 24 hours. The solution was then exposed to air by opening the tube, and its spectrum was recorded as “quenched”.

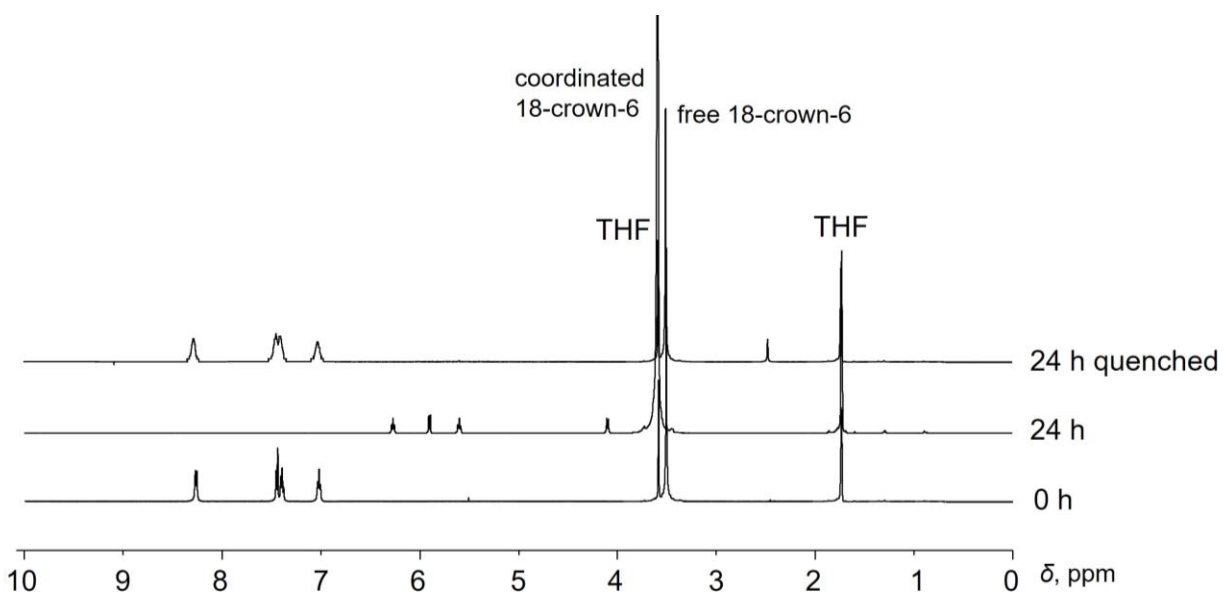

**Figure S19.** <sup>1</sup>H NMR spectra of **1**, *in situ* generated **1**<sup>2-</sup>, and its quenched product at 25 °C in THF-*d*<sub>8</sub>.

### DART-MS Sample Preparation

2 mg of **1** and a piece of Na metal (excess) were added into a glass tube, followed by the addition of 2.0 mL of fresh THF. The tube was sealed under argon. After the formation of doubly-reduced product of **1** in 48 hours, the solution was exposed to air by opening the tube, and the spectrum was recorded as quenched **1**<sup>2-</sup>.

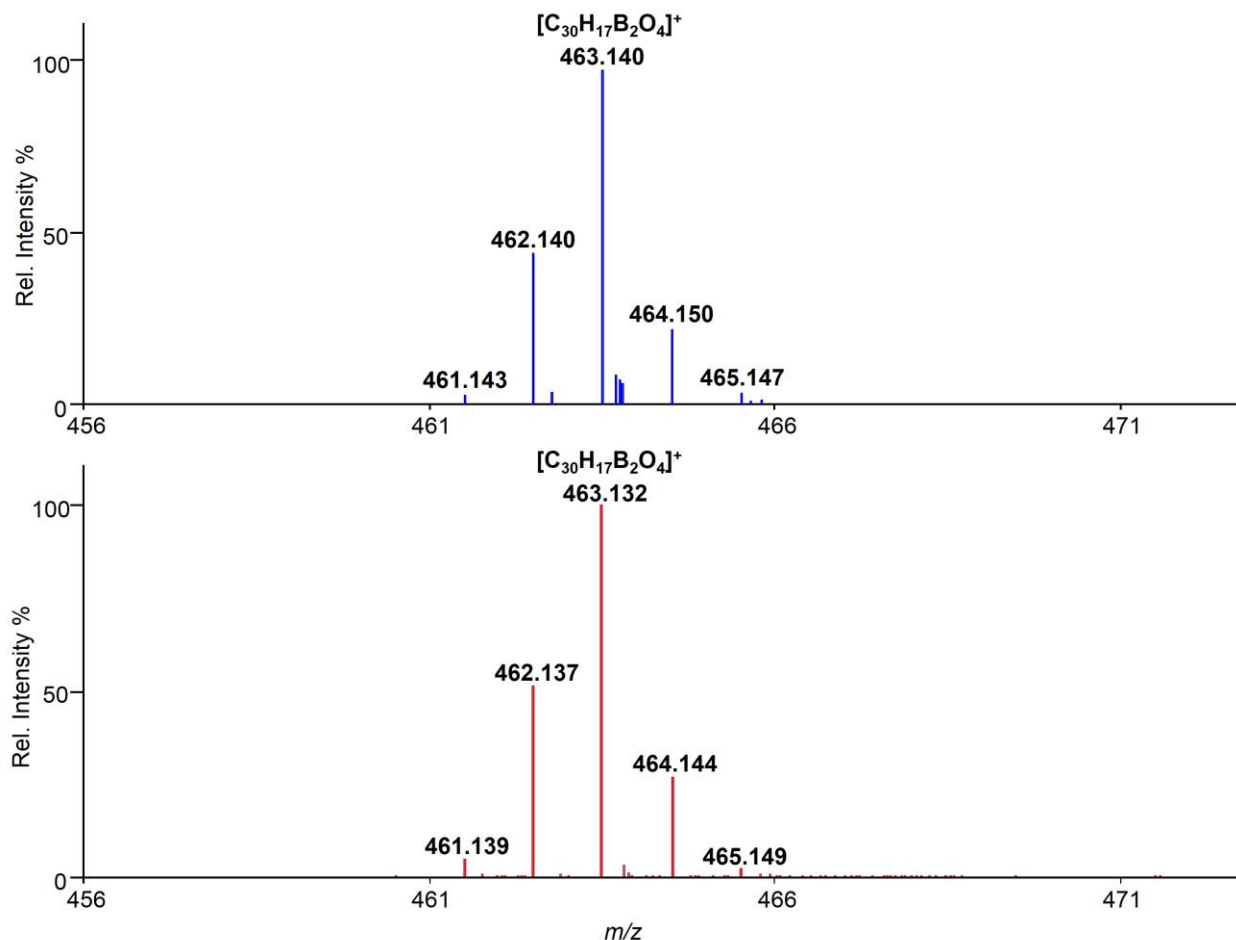

**Figure S20.** DART-MS spectra of **1** (bottom) and the quenched product of *in situ* generated **1**<sup>2-</sup> (top). Mass spectra were acquired using a DART-SVP ion source (IonSense, Saugus, MA, USA) coupled to a JEOL AccuTOF time-offlight mass spectrometer (JEOL USA, Peabody, MA, USA). Settings: DART positive mode, 5–20 V (orifice voltage), 350 °C (heater temperature).

## V. Crystal Structure Solution and Refinement Details

Data collection of **2**·2THF was performed on a Bruker D8 VENTURE X-ray diffractometer with PHOTON 100 CMOS shutterless mode detector equipped with a Cu-target X-ray tube ( $\lambda = 1.54178$  Å) at  $T = 100(2)$  K. Data collection of **3**·0.5THF was performed on a Bruker D8 VENTURE X-ray diffractometer with PHOTON 100 CMOS detector equipped with a Mo-target X-ray tube ( $\lambda = 0.71073$  Å) at  $T = 100(2)$  K. Data reduction and integration were performed with the Bruker software package SAINT (version 8.38A).<sup>[3]</sup> Data were corrected for absorption effects using the empirical methods as implemented in SADABS (version 2016/2).<sup>[4]</sup> The structure was solved by SHELXT (version 2015/5)<sup>[5]</sup> and refined by full-matrix least-squares procedures using the Bruker SHELXTL (version 2017/1)<sup>[6]</sup> software package. All non-hydrogen atoms were refined anisotropically. H-atoms were included at calculated positions and refined as riders, with  $U_{\text{iso}}(\text{H}) = 1.2 U_{\text{eq}}(\text{C})$  and  $U_{\text{iso}}(\text{H}) = 1.5 U_{\text{eq}}(\text{C})$  for methyl groups. In **2**·2THF, three THF molecules bound to a sodium cation were found to be disordered. The disorder was modelled with two orientations with relative occupancies of 0.62:0.38, 0.66:0.34 and 0.67:0.33 for the two parts separately. In each disordered THF molecule, the geometries of two disordered parts were restrained to be similar. The anisotropic displacement parameters of the disordered THF molecule in the direction of the bonds were restrained to be equal with a standard uncertainty of  $0.004 \text{ Å}^2$ . They were also restrained to have the same  $U_{ij}$  components, with a standard uncertainty of  $0.01 \text{ Å}^2$ . The structure model of **2**·2THF was refined as a 2-component inversion twin with BASF value refined to 0.35390. Two solvent THF molecules in **2**·2THF were refined anisotropically and their H-atoms were included at calculated positions and refined as riders, with  $U_{\text{iso}}(\text{H}) = 1.2 U_{\text{eq}}(\text{C})$ . In **3**·0.5THF, the 18-crown-6 ether molecule was found to be disordered and was modelled with two orientations having relative occupancies of 0.75:0.25 for the two parts. The geometries of the disordered parts were restrained to be similar. The anisotropic displacement parameters of the disordered molecules in the direction of the bonds were restrained to be equal with a standard uncertainty of  $0.004 \text{ Å}^2$ . They were also restrained to have the same  $U_{ij}$  components, with a standard uncertainty of  $0.01 \text{ Å}^2$ . In the unit cell of **3**·0.5THF, there is one-half THF solvent molecule that was found to be severely disordered and was removed by the SQUEEZE routine in PLATON (version 201117).<sup>[7]</sup> The total void volume was  $159 \text{ Å}^3$  indicated by PLATON, equivalent to 5.12 % of the unit cell's total volume. Further crystal and data collection details are listed in Table S1.

**Table S1.** Crystal Data and Structure Refinement Parameters for **2·2THF** and **3·0.5THF**.

| Compound                                                                                | <b>2·2THF</b>                                                                   | <b>3·0.5THF</b>                                                                 |
|-----------------------------------------------------------------------------------------|---------------------------------------------------------------------------------|---------------------------------------------------------------------------------|
| Empirical formula                                                                       | C <sub>78</sub> H <sub>112</sub> B <sub>2</sub> Na <sub>2</sub> O <sub>22</sub> | C <sub>64</sub> H <sub>84</sub> B <sub>2</sub> K <sub>2</sub> O <sub>18.5</sub> |
| Formula weight                                                                          | 1469.28                                                                         | 1249.13                                                                         |
| Temperature (K)                                                                         | 100(2)                                                                          | 100(2)                                                                          |
| Wavelength (Å)                                                                          | 1.54178                                                                         | 0.71073                                                                         |
| Crystal system                                                                          | Orthorhombic                                                                    | Triclinic                                                                       |
| Space group                                                                             | <i>Pna2</i> <sub>1</sub>                                                        | <i>P</i> -1                                                                     |
| <i>a</i> (Å)                                                                            | 18.0991 (6)                                                                     | 13.0199(11)                                                                     |
| <i>b</i> (Å)                                                                            | 21.4983 (8)                                                                     | 13.0961(11)                                                                     |
| <i>c</i> (Å)                                                                            | 19.8705 (7)                                                                     | 19.1830(15)                                                                     |
| $\alpha$ (°)                                                                            | 90.00                                                                           | 76.781(2)                                                                       |
| $\beta$ (°)                                                                             | 90.00                                                                           | 79.297(2)                                                                       |
| $\gamma$ (°)                                                                            | 90.00                                                                           | 80.822(2)                                                                       |
| <i>V</i> (Å <sup>3</sup> )                                                              | 7731.6 (5)                                                                      | 3105.3(4)                                                                       |
| <i>Z</i>                                                                                | 4                                                                               | 2                                                                               |
| $\rho_{\text{calcd}}$ (g·cm <sup>-3</sup> )                                             | 1.262                                                                           | 1.336                                                                           |
| $\mu$ (mm <sup>-1</sup> )                                                               | 0.835                                                                           | 0.226                                                                           |
| <i>F</i> (000)                                                                          | 3152                                                                            | 1328                                                                            |
| Crystal size (mm)                                                                       | 0.02×0.04×0.09                                                                  | 0.03×0.21×0.25                                                                  |
| $\theta$ range for data collection (°)                                                  | 3.028-66.797                                                                    | 2.924-25.138                                                                    |
| Reflections collected                                                                   | 195276                                                                          | 53886                                                                           |
| Independent reflections                                                                 | 13697                                                                           | 11065                                                                           |
|                                                                                         | [ <i>R</i> <sub>int</sub> = 0.2403]                                             | [ <i>R</i> <sub>int</sub> = 0.0782]                                             |
| Transmission factors (min/max)                                                          | 0.8742/1                                                                        | 0.8869/1                                                                        |
| Data/restraints/params.                                                                 | 13697/661/1076                                                                  | 11065/883/920                                                                   |
| <i>R</i> 1, <sup>a</sup> <i>wR</i> 2 <sup>b</sup> ( <i>I</i> > 2 $\sigma$ ( <i>I</i> )) | 0.0611, 0.1259                                                                  | 0.0613, 0.1042                                                                  |
| <i>R</i> 1, <sup>a</sup> <i>wR</i> 2 <sup>b</sup> (all data)                            | 0.0950, 0.1419                                                                  | 0.1170, 0.1327                                                                  |
| Quality-of-fit <sup>c</sup>                                                             | 1.047                                                                           | 1.034                                                                           |

<sup>a</sup> $R1 = \Sigma||F_o| - |F_c|| / \Sigma|F_o|$ . <sup>b</sup> $wR2 = [\Sigma[w(F_o^2 - F_c^2)^2] / \Sigma[w(F_o^2)^2]]$ .

<sup>c</sup>Quality-of-fit =  $[\Sigma[w(F_o^2 - F_c^2)^2] / (N_{\text{obs}} - N_{\text{params}})]^{1/2}$ , based on all data.

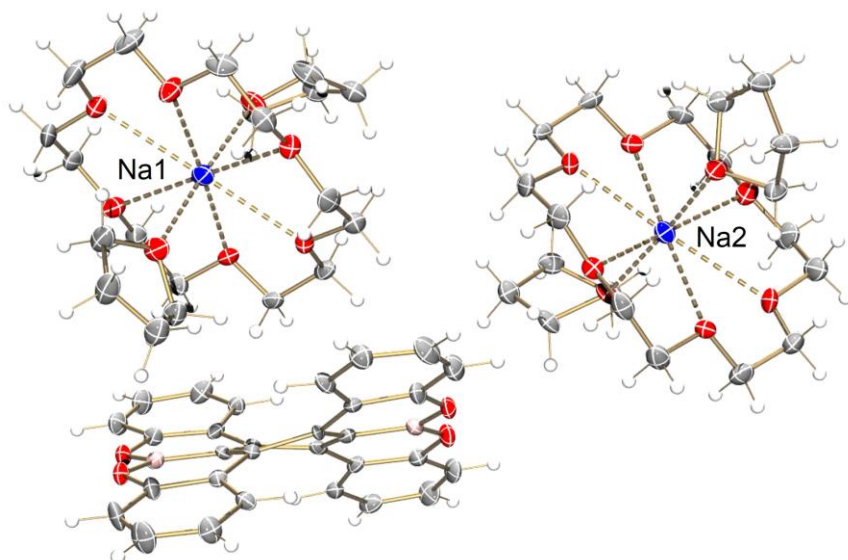

**Figure S21.** ORTEP drawing of asymmetric unit of **2**, drawn with thermal ellipsoids at the 40% probability level. Color scheme used: C grey, H white, O red, B pink and Na blue.

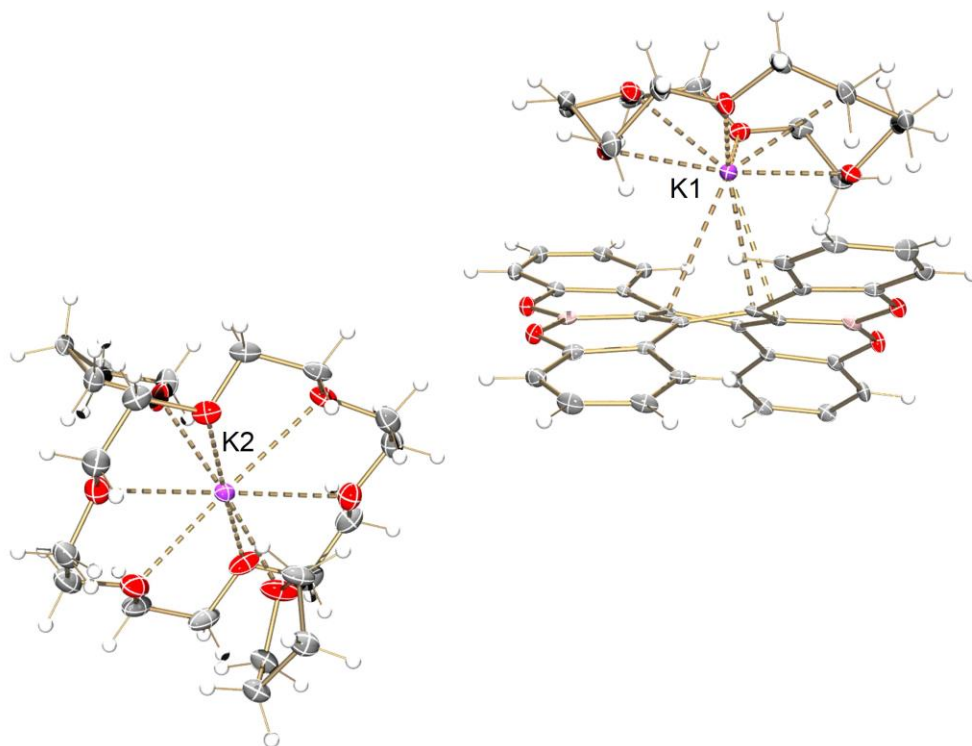

**Figure S22.** ORTEP drawing of asymmetric unit of **3**, drawn with thermal ellipsoids at the 40% probability level. Color scheme used: C grey, H white, O red, B pink and K dark orchid.

**Table S2.** Selected C–C bond distances in **1**, **2** and **3** (in Å) along with C-atom numbering scheme.

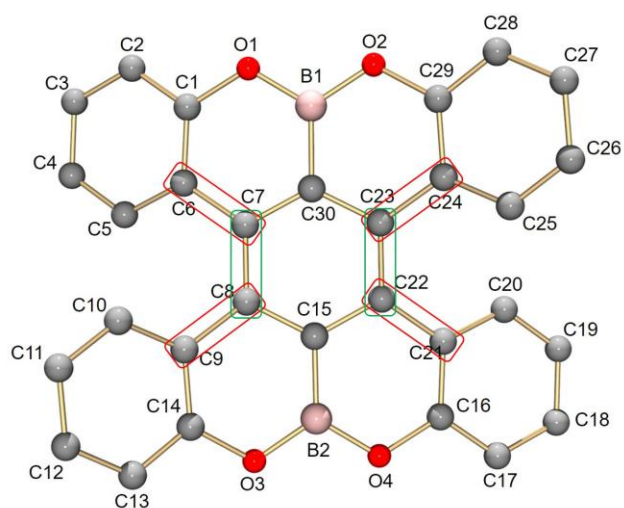

| Bond    | 1        | 2         | 3        | Bond    | 1        | 2         | 3        |
|---------|----------|-----------|----------|---------|----------|-----------|----------|
| C1–C2   | 1.393(5) | 1.365(9)  | 1.382(5) | C15–C22 | 1.403(5) | 1.411(9)  | 1.412(4) |
| C1–C6   | 1.397(5) | 1.415(9)  | 1.420(5) | C16–C17 | 1.385(5) | 1.368(9)  | 1.375(5) |
| C2–C3   | 1.378(5) | 1.398(9)  | 1.397(5) | C16–C21 | 1.411(5) | 1.424(9)  | 1.425(5) |
| C3–C4   | 1.388(5) | 1.394(10) | 1.379(5) | C17–C18 | 1.383(5) | 1.381(10) | 1.397(5) |
| C4–C5   | 1.386(5) | 1.378(9)  | 1.389(5) | C18–C19 | 1.393(5) | 1.391(10) | 1.383(5) |
| C5–C6   | 1.493(5) | 1.417(8)  | 1.419(4) | C19–C20 | 1.381(5) | 1.368(9)  | 1.376(5) |
| C6–C7   | 1.478(5) | 1.446(9)  | 1.445(4) | C20–C21 | 1.404(5) | 1.440(9)  | 1.421(4) |
| C7–C8   | 1.430(5) | 1.475(9)  | 1.479(4) | C21–C22 | 1.472(5) | 1.446(9)  | 1.448(4) |
| C7–C30  | 1.402(5) | 1.401(9)  | 1.401(9) | C22–C23 | 1.430(5) | 1.499(9)  | 1.483(4) |
| C8–C9   | 1.467(5) | 1.450(9)  | 1.447(4) | C23–C24 | 1.474(5) | 1.435(9)  | 1.440(4) |
| C8–C15  | 1.401(5) | 1.408(9)  | 1.415(4) | C23–C30 | 1.416(5) | 1.419(9)  | 1.420(4) |
| C9–C10  | 1.413(5) | 1.404(9)  | 1.421(5) | C24–C25 | 1.415(5) | 1.398(8)  | 1.398(8) |
| C9–C14  | 1.413(5) | 1.428(9)  | 1.418(5) | C24–C29 | 1.406(5) | 1.431(9)  | 1.423(5) |
| C10–C11 | 1.374(5) | 1.398(9)  | 1.383(4) | C25–C26 | 1.368(5) | 1.393(9)  | 1.380(5) |
| C11–C12 | 1.403(5) | 1.392(10) | 1.386(5) | C26–C27 | 1.396(5) | 1.391(10) | 1.386(5) |
| C12–C13 | 1.369(5) | 1.387(10) | 1.392(5) | C27–C28 | 1.371(5) | 1.378(10) | 1.389(5) |
| C13–C14 | 1.386(5) | 1.369(9)  | 1.376(4) | C28–C29 | 1.376(5) | 1.365(9)  | 1.376(5) |

(Note: distance difference over 0.2 is labeled with green (higher) and red (lower) color)

**Table S3.** Selected bond distances in **1**, **2** and **3** (in Å).

| Bond   | <b>1</b> | <b>2</b> | <b>3</b> |
|--------|----------|----------|----------|
| B1–O1  | 1.377(5) | 1.368(8) | 1.378(4) |
| B1–O2  | 1.377(5) | 1.375(8) | 1.368(4) |
| B1–C30 | 1.512(6) | 1.519(7) | 1.510(5) |
| B2–O3  | 1.366(6) | 1.374(9) | 1.369(4) |
| B2–O4  | 1.370(6) | 1.366(9) | 1.383(4) |
| B2–C15 | 1.516(6) | 1.516(7) | 1.504(5) |

**Table S4.** Selected torsion angles and plane angles in **1**, **2** and **3** (in °) along with a labeling scheme.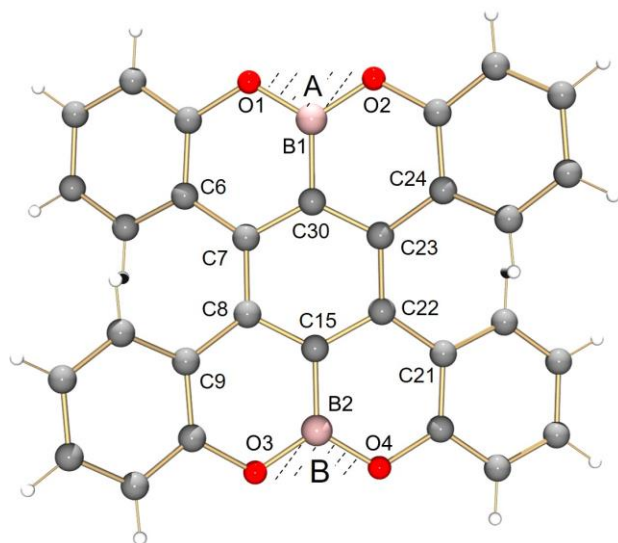

| Name            | <b>1</b> | <b>2</b> | <b>3</b> |
|-----------------|----------|----------|----------|
| C6–C7–C8–C9     | 32.3     | 34.19    | 34.05    |
| C15–C8–C7–C30   | 24.5     | 19.44    | 21.67    |
| C15–C22–C23–C30 | 23.54    | 18.95    | 20.92    |
| C21–C22–C23–C24 | 28.2     | 35.06    | 35.08    |
| A/B             | 21.39    | 24.65    | 31.75    |

## VI. Theoretical Calculations

Density functional theory (DFT) calculations were performed using the Gaussian 09 software package.<sup>[8]</sup> The geometries were optimized and the energies were calculated at the B3LYP/6-311++G(d,p) level. No symmetry restrictions were used during the calculations. The calculated structures correspond to local energy minima (without imaginary frequencies). The electrostatic potential (ESP) maps of the neutral **1** and the dianionic **1**<sup>2-</sup> were generated by GaussView.

**Table S5.** Cartesian coordinates of the neutral **1**.

| Tag | Symbol | X         | Y         | Z         |
|-----|--------|-----------|-----------|-----------|
| 1   | C      | -1.242338 | 0.696617  | -0.144123 |
| 2   | C      | -1.242313 | -0.696663 | 0.144067  |
| 3   | C      | 0.000031  | -1.353778 | 0.000026  |
| 4   | C      | 1.242353  | -0.696628 | -0.144071 |
| 5   | C      | 1.242328  | 0.696673  | 0.144023  |
| 6   | C      | -0.000017 | 1.353777  | -0.000071 |
| 7   | C      | -2.372665 | 1.511491  | -0.628220 |
| 8   | C      | -2.372605 | -1.511569 | 0.628189  |
| 9   | C      | 2.372674  | -1.511538 | -0.628128 |
| 10  | C      | 2.372610  | 1.511616  | 0.628109  |
| 11  | C      | 2.274136  | -2.922169 | -0.655305 |
| 12  | C      | 3.315686  | -3.720183 | -1.128952 |
| 13  | C      | 4.460349  | -3.133527 | -1.646196 |
| 14  | C      | 4.554713  | -1.740098 | -1.708436 |
| 15  | C      | 3.528233  | -0.953085 | -1.211809 |
| 16  | C      | -3.528196 | -0.953101 | 1.211791  |
| 17  | C      | -4.554649 | -1.740103 | 1.708490  |
| 18  | C      | -4.460224 | -3.133535 | 1.646405  |
| 19  | C      | -3.315528 | -3.720199 | 1.129242  |
| 20  | C      | -2.274006 | -2.922192 | 0.655522  |
| 21  | C      | -2.274125 | 2.922120  | -0.655513 |
| 22  | C      | -3.315684 | 3.720097  | -1.129200 |
| 23  | C      | -4.460361 | 3.133401  | -1.646368 |
| 24  | C      | -4.554732 | 1.739967  | -1.708487 |
| 25  | C      | -3.528243 | 0.952992  | -1.211819 |
| 26  | C      | 3.528180  | 0.953194  | 1.211798  |
| 27  | C      | 4.554622  | 1.740235  | 1.708457  |
| 28  | C      | 4.460206  | 3.133661  | 1.646245  |
| 29  | C      | 3.315525  | 3.720285  | 1.129005  |
| 30  | C      | 2.274012  | 2.922241  | 0.655326  |

|    |   |           |           |           |
|----|---|-----------|-----------|-----------|
| 31 | O | -1.144542 | 3.584586  | -0.251034 |
| 32 | O | 1.144419  | 3.584644  | 0.250771  |
| 33 | O | -1.144405 | -3.584625 | 0.251036  |
| 34 | O | 1.144559  | -3.584605 | -0.250762 |
| 35 | B | -0.000042 | 2.876053  | -0.000139 |
| 36 | B | 0.000059  | -2.876054 | 0.000081  |
| 37 | H | 3.187953  | -4.795469 | -1.102502 |
| 38 | H | 5.263970  | -3.755949 | -2.022322 |
| 39 | H | 5.425661  | -1.270387 | -2.150068 |
| 40 | H | 3.610699  | 0.122570  | -1.282513 |
| 41 | H | -3.610710 | 0.122560  | 1.282369  |
| 42 | H | -5.425625 | -1.270379 | 2.150053  |
| 43 | H | -5.263824 | -3.755950 | 2.022587  |
| 44 | H | -3.187751 | -4.795482 | 1.102906  |
| 45 | H | -3.187949 | 4.795385  | -1.102839 |
| 46 | H | -5.263990 | 3.755795  | -2.022526 |
| 47 | H | -5.425695 | 1.270221  | -2.150055 |
| 48 | H | -3.610717 | -0.122669 | -1.282424 |
| 49 | H | 3.610686  | -0.122461 | 1.282476  |
| 50 | H | 5.425582  | 1.270546  | 2.150091  |
| 51 | H | 5.263798  | 3.756106  | 2.022397  |
| 52 | H | 3.187751  | 4.795566  | 1.102579  |

**Table S6.** Cartesian coordinates of the dianion **1**<sup>2-</sup>.

| Tag | Symbol | X         | Y         | Z         |
|-----|--------|-----------|-----------|-----------|
| 1   | C      | -1.247309 | 0.725717  | -0.138211 |
| 2   | C      | -1.247302 | -0.725729 | 0.138195  |
| 3   | C      | 0.000004  | -1.376035 | 0.000036  |
| 4   | C      | 1.247305  | -0.725726 | -0.138162 |
| 5   | C      | 1.247298  | 0.725738  | 0.138151  |
| 6   | C      | -0.000009 | 1.376035  | -0.000050 |
| 7   | C      | -2.339475 | 1.506576  | -0.666373 |
| 8   | C      | -2.339460 | -1.506598 | 0.666361  |
| 9   | C      | 2.339474  | -1.506618 | -0.666268 |
| 10  | C      | 2.339456  | 1.506639  | 0.666265  |
| 11  | C      | 2.253880  | -2.934918 | -0.756893 |
| 12  | C      | 3.275168  | -3.714186 | -1.273562 |
| 13  | C      | 4.452925  | -3.126466 | -1.765383 |
| 14  | C      | 4.554181  | -1.732701 | -1.739763 |
| 15  | C      | 3.533973  | -0.948184 | -1.214772 |

|    |   |           |           |           |
|----|---|-----------|-----------|-----------|
| 16 | C | -3.533956 | -0.948139 | 1.214846  |
| 17 | C | -4.554150 | -1.732631 | 1.739901  |
| 18 | C | -4.452880 | -3.126393 | 1.765610  |
| 19 | C | -3.275124 | -3.714134 | 1.273816  |
| 20 | C | -2.253849 | -2.934891 | 0.757083  |
| 21 | C | -2.253881 | 2.934871  | -0.757084 |
| 22 | C | -3.275165 | 3.714107  | -1.273809 |
| 23 | C | -4.452917 | 3.126356  | -1.765605 |
| 24 | C | -4.554172 | 1.732593  | -1.739904 |
| 25 | C | -3.533968 | 0.948108  | -1.214857 |
| 26 | C | 3.533957  | 0.948214  | 1.214775  |
| 27 | C | 4.554153  | 1.732739  | 1.739778  |
| 28 | C | 4.452882  | 3.126503  | 1.765405  |
| 29 | C | 3.275122  | 3.714213  | 1.273582  |
| 30 | C | 2.253845  | 2.934938  | 0.756901  |
| 31 | O | -1.125793 | 3.611184  | -0.331133 |
| 32 | O | 1.125751  | 3.611215  | 0.330907  |
| 33 | O | -1.125756 | -3.611195 | 0.331129  |
| 34 | O | 1.125789  | -3.611205 | -0.330907 |
| 35 | B | -0.000015 | 2.889565  | -0.000099 |
| 36 | B | 0.000010  | -2.889565 | 0.000080  |
| 37 | H | 3.128208  | -4.789621 | -1.293442 |
| 38 | H | 5.250981  | -3.742755 | -2.167002 |
| 39 | H | 5.440289  | -1.245283 | -2.139168 |
| 40 | H | 3.634501  | 0.128127  | -1.233055 |
| 41 | H | -3.634493 | 0.128173  | 1.233061  |
| 42 | H | -5.440258 | -1.245195 | 2.139286  |
| 43 | H | -5.250926 | -3.742664 | 2.167279  |
| 44 | H | -3.128152 | -4.789567 | 1.293765  |
| 45 | H | -3.128205 | 4.789541  | -1.293752 |
| 46 | H | -5.250970 | 3.742621  | -2.167269 |
| 47 | H | -5.440275 | 1.245150  | -2.139289 |
| 48 | H | -3.634494 | -0.128204 | -1.233078 |
| 49 | H | 3.634496  | -0.128096 | 1.233052  |
| 50 | H | 5.440264  | 1.245328  | 2.139186  |
| 51 | H | 5.250930  | 3.742798  | 2.167032  |
| 52 | H | 3.128150  | 4.789647  | 1.293467  |

---

## VII. References

---

- [1] N. V. Kozhemyakina, J. Nuss, M. Jansen, *Z. Anorg. Allg. Chem.* **2009**, 635, 1355-1361.
- [2] X.-Y. Wang, A. Narita, W. Zhang, X. Feng, K. Müllen, *J. Am. Chem. Soc.* **2016**, 138, 9021-9024.
- [3] SAINT; part of Bruker APEX3 software package (version 2017.3-0): Bruker AXS, 2017.
- [4] SADABS; part of Bruker APEX3 software package (version 2017.3-0): Bruker AXS, 2017.
- [5] G. M. Sheldrick *Acta Cryst.* **2015**, A71, 3-8.
- [6] G. M. Sheldrick, *Acta Cryst.* **2015**, C71, 3-8.
- [7] A. L. Spek, *Acta Cryst.* **2015**, C71, 9-19.
- [8] Gaussian 09, Revision D.01, Frisch, M. J.; Trucks, G. W.; Schlegel, H. B.; Scuseria, G. E.; Robb, M. A.; Cheeseman, J. R.; Scalmani, G.; Barone, V.; Mennucci, B.; Petersson, G. A.; Nakatsuji, H.; Caricato, M.; Li, X.; Hratchian, H. P.; Izmaylov, A. F.; Bloino, J.; Zheng, G.; Sonnenberg, J. L.; Hada, M.; Ehara, M.; Toyota, K.; Fukuda, R.; Hasegawa, J.; Ishida, M.; Nakajima, T.; Honda, Y.; Kitao, O.; Nakai, H.; Vreven, T.; Montgomery, Jr., J. A.; Peralta, J. E.; Ogliaro, F.; Bearpark, M.; Heyd, J. J.; Brothers, E.; Kudin, K. N.; Staroverov, V. N.; Kobayashi, R.; Normand, J.; Raghavachari, K.; Rendell, A.; Burant, J. C.; Iyengar, S. S.; Tomasi, J.; Cossi, M.; Rega, N.; Millam, N. J.; Klene, M.; Knox, J. E.; Cross, J. B.; Bakken, V.; Adamo, C.; Jaramillo, J.; Gomperts, R.; Stratmann, R. E.; Yazyev, O.; Austin, A. J.; Cammi, R.; Pomelli, C.; Ochterski, J. W.; Martin, R. L.; Morokuma, K.; Zakrzewski, V. G.; Voth, G. A.; Salvador, P.; Dannenberg, J. J.; Dapprich, S.; Daniels, A. D.; Farkas, Ö.; Foresman, J. B.; Ortiz, J. V.; Cioslowski, J.; Fox, D. J. Gaussian, Inc., Wallingford CT, 2013.
